# Supplementary material for: Three-dimensional macroporous graphene monoliths with entrapped MoS2 nanoflakes from single-step synthesis for high-performance sodium-ion batteries
Source: RSC Adv. 2018 Jan 10;8(5):2477–84. doi: 10.1039/c7ra12617d (PMC9077459; doi:10.1039/c7ra12617d)
Supplement: RA-008-C7RA12617D-s001 [file RA-008-C7RA12617D-s001.pdf]

Three-dimensional macroporous graphene  
monoliths with entrapped MoS<sub>2</sub> nanoflakes from  
single-step synthesis for high-performance  
sodium-ion batteries

*Linfeng Fei, Ming Xu, Juan Jiang, Sheung Mei Ng, Longlong Shu, Li Sun, Keyu Xie,  
Haitao Huang, Chi Wah Leung, Chee Leung Mak,\* and Yu Wang\**

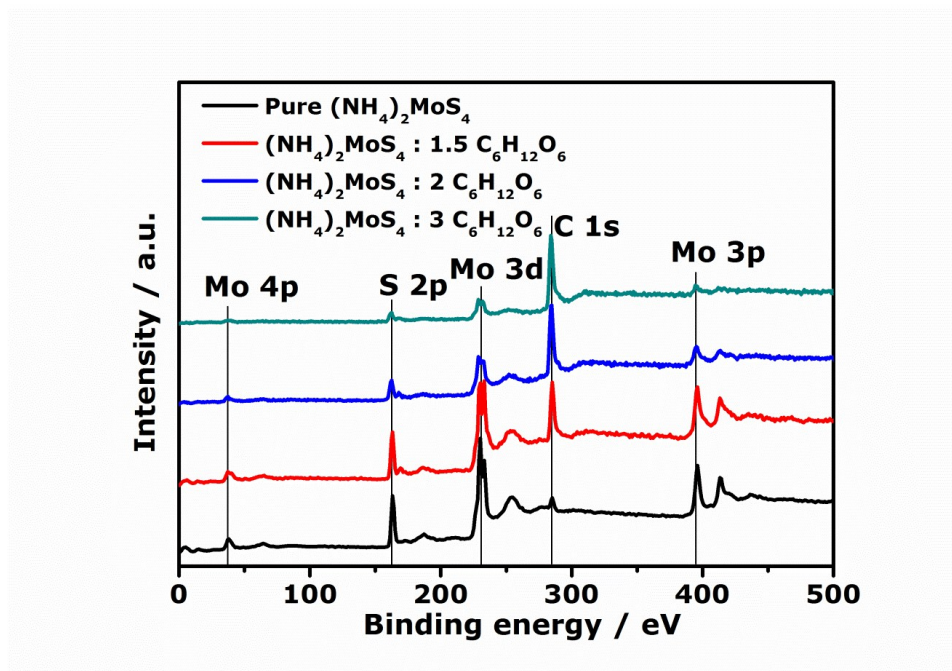

**Figure S1.** XPS survey profiles for different  $\text{MoS}_2@\text{G}$  hybrid composites from varied ratios of  $(\text{NH}_4)_2\text{MoS}_4$  and glucose as precursors. From XPS measurement, the weight percentages of carbon in the composites can be estimated as 3.1% (black line), 28.1% (red line), 37.3% (blue line), and 52.7% (cyan line).

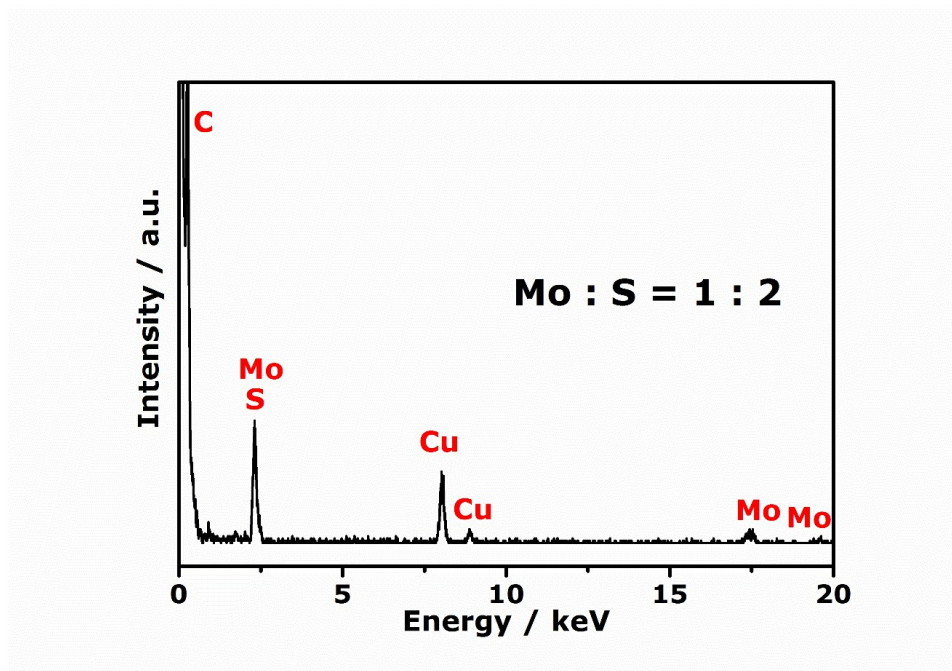

**Figure S2.** The EDS spectra of the MoS<sub>2</sub>@G hybrid from the nanoflakes region, showing the atomic ratio for Mo and S is roughly 1:2.

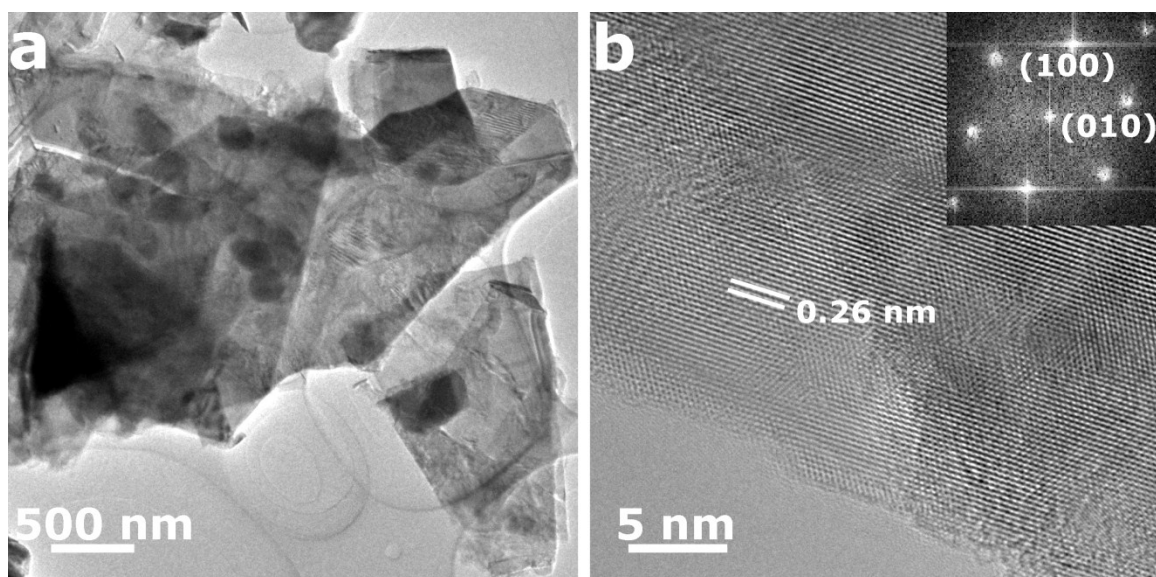

**Figure S3.** (a) The TEM and (b) HRTEM images for the pure MoS<sub>2</sub> sample. The inset in (b) is the SAED pattern from an isolated flake.

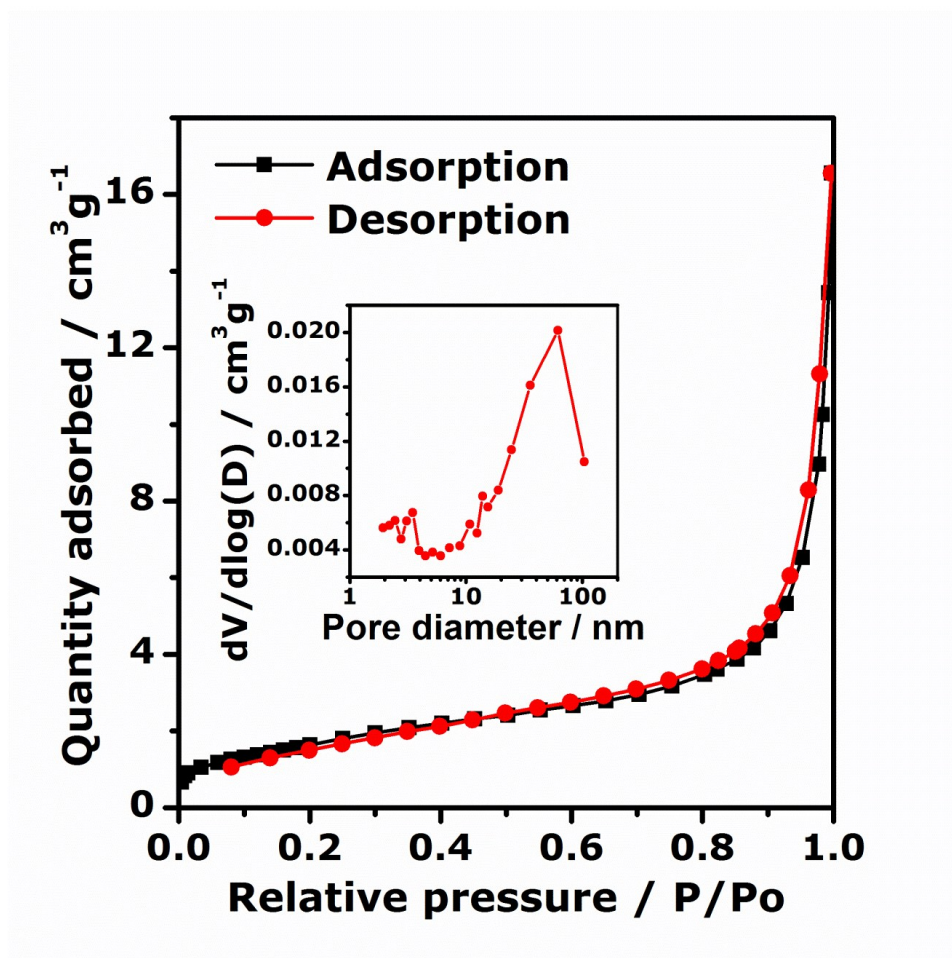

**Figure S4.** N<sub>2</sub> adsorption/desorption isotherms for the MoS<sub>2</sub> sample and the corresponding pore-size distribution (inset).

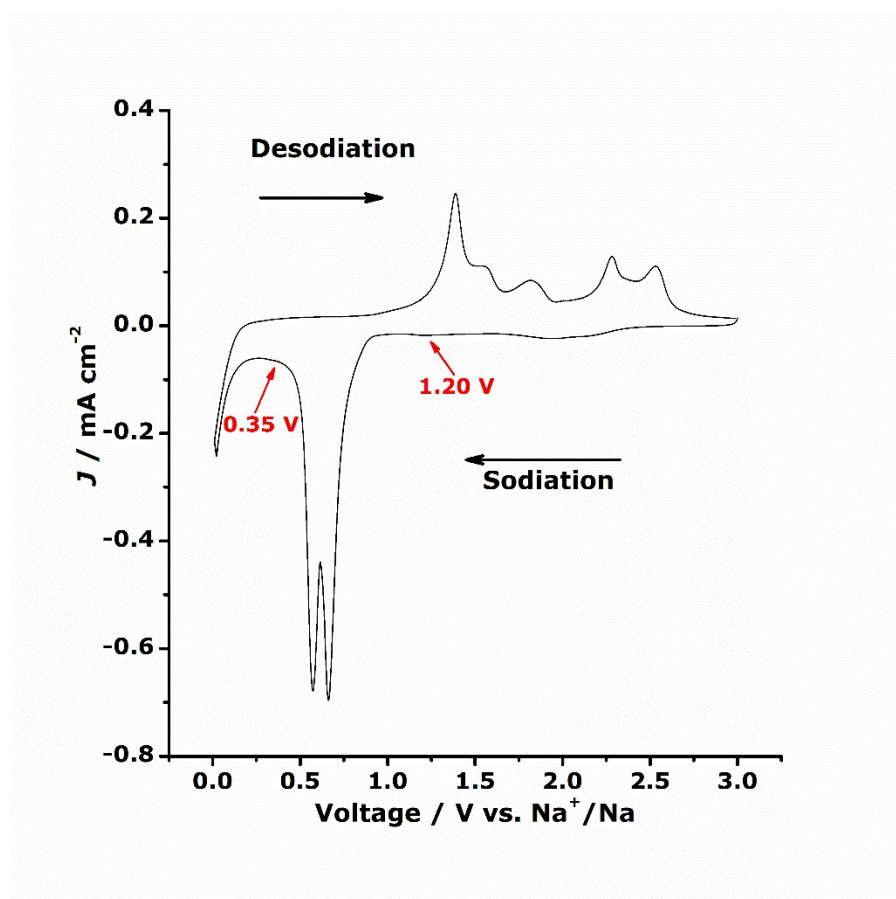

**Figure S5.** The initial CV profiles of MoS<sub>2</sub>@G hybrid measured at 0.2 mV s<sup>-1</sup> in the voltage window of 0.01 - 3 V.

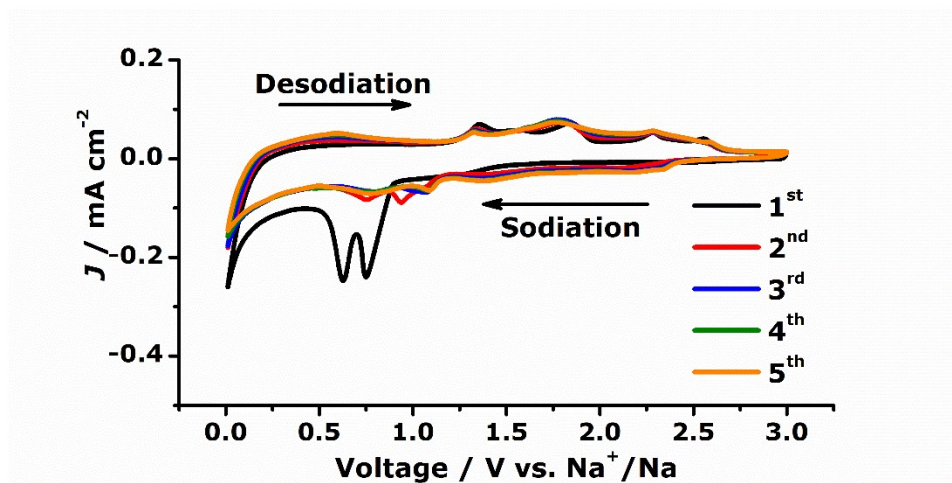

**Figure S6.** The initial CV profiles of MoS<sub>2</sub> sample measured at 0.2 mV s<sup>-1</sup> in the voltage window of 0.01 - 3 V.

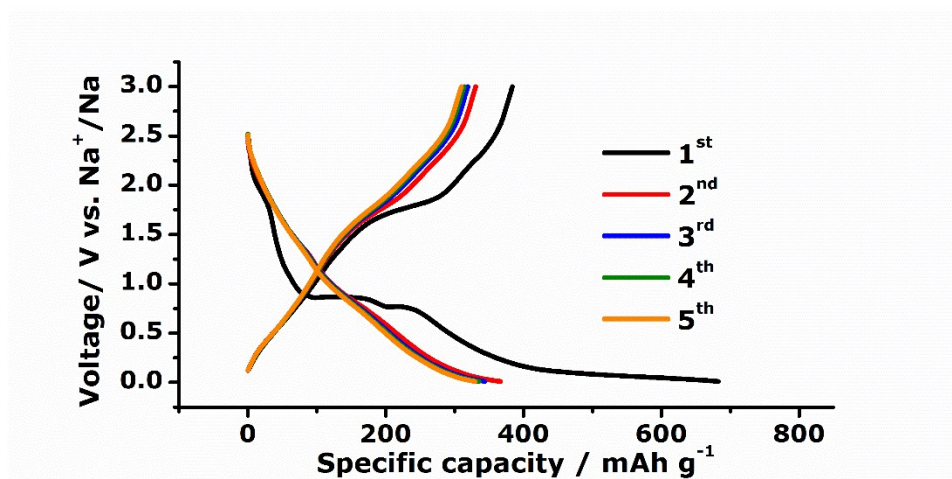

**Figure S7.** The initial galvanostatic discharge/charge curves for MoS<sub>2</sub> sample at 0.05 A g<sup>-1</sup> in the voltage range of 0.01 - 3 V.

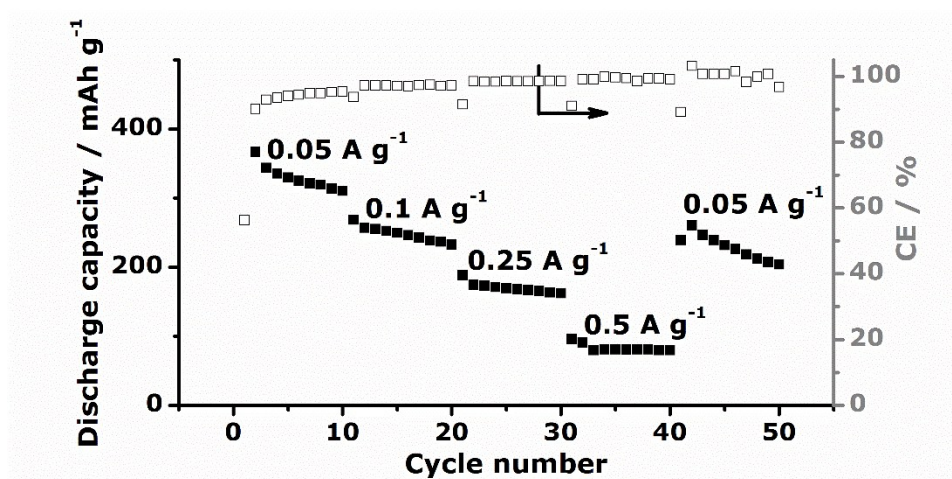

**Figure S8.** Rate performance of  $\text{MoS}_2$  sample at programmed current densities.

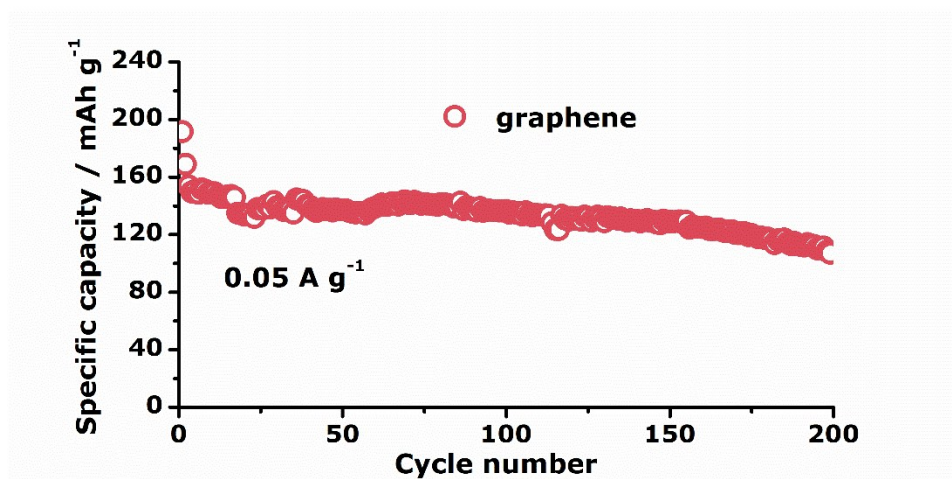

**Figure S9.** The cycling performance of graphene measured at 0.05 A g<sup>-1</sup>.

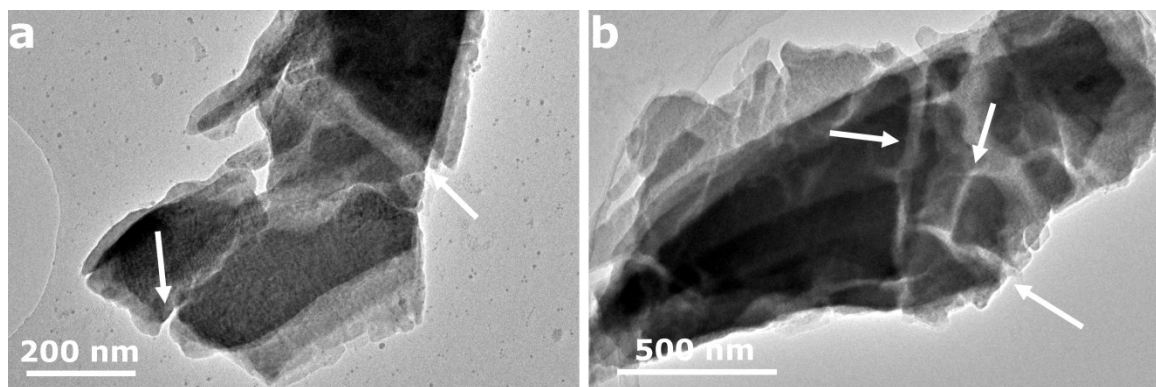

**Figure S10.** TEM characterizations of the MoS<sub>2</sub> flakes after cycling. The white arrows in both panels indicate the pulverization of flakes after repeated sodiation/desodiation.

**Table S1.** Comparison of electrochemical performances for the reported MoS<sub>2</sub>-based materials (calculated on the whole composite).

| MoS <sub>2</sub> -based materials                | Cyclability (capacity retention, compared with the 2 <sup>nd</sup> cycle)                                                                  | Rate performance                                     | Ref.      |
|--------------------------------------------------|--------------------------------------------------------------------------------------------------------------------------------------------|------------------------------------------------------|-----------|
| MoS <sub>2</sub> @G hybrid                       | 484 mAh g <sup>-1</sup> at 0.1 A g <sup>-1</sup> ,<br>100 cycles (98%)<br>371 mAh g <sup>-1</sup> at 0.5 A g <sup>-1</sup> ,<br>200 cycles | 357 mAh g <sup>-1</sup> at<br>0.5 A g <sup>-1</sup>  | This work |
| MoS <sub>2</sub> /amorphous carbon microspheres  | 425 mAh g <sup>-1</sup> at 0.3 A g <sup>-1</sup> ,<br>100 cycles (94%)                                                                     | 186 mAh g <sup>-1</sup> at<br>7.0 A g <sup>-1</sup>  | [1]       |
| MoS <sub>2</sub> /C nanospheres                  | 381 mAh g <sup>-1</sup> at 0.067 A g <sup>-1</sup> ,<br>50 cycles (77%)                                                                    | 294 mAh g <sup>-1</sup> at<br>1.34 A g <sup>-1</sup> | [2]       |
| MoS <sub>2</sub> /Graphene Microspheres          | 480 mAh g <sup>-1</sup> at 0.2 A g <sup>-1</sup> , 50<br>cycles (88%)                                                                      | 234 mAh g <sup>-1</sup> at<br>10.0 A g <sup>-1</sup> | [3]       |
| Single-layered MoS <sub>2</sub> /carbon nanowire | 436 mAh g <sup>-1</sup> at 1.0 A g <sup>-1</sup> ,<br>100 cycles (60%)                                                                     | 139 mAh g <sup>-1</sup> at<br>20.0 A g <sup>-1</sup> | [4]       |
| MoS <sub>2</sub> /graphene composite             | 218mAh g <sup>-1</sup> at 0.025 A g <sup>-1</sup> ,<br>20 cycles (83%)                                                                     | 173 mAh g <sup>-1</sup> at<br>0.2 A g <sup>-1</sup>  | [5]       |
| MoS <sub>2</sub> /graphene                       | 313 mAh g <sup>-1</sup> at 0.1 A g <sup>-1</sup> ,<br>200 cycles (81%)                                                                     | 280 mAh g <sup>-1</sup> at<br>0.1 A g <sup>-1</sup>  | [6]       |
| Ultrathin MoS <sub>2</sub> nanosheets            | 386 mAh g <sup>-1</sup> at 0.04 A g <sup>-1</sup> ,<br>100 cycles (73%)                                                                    | 251 mAh g <sup>-1</sup> at<br>0.32 A g <sup>-1</sup> | [7]       |
| Mesoporous MoS <sub>2</sub> /C microspheres      | 484 mAh g <sup>-1</sup> at 0.1 A g <sup>-1</sup> ,<br>100 cycles (94%)                                                                     | 244 mAh g <sup>-1</sup> at<br>20.0 A g <sup>-1</sup> | [8]       |

## References

- (1) Choi, S. H.; Kang, Y. C. Polystyrene-Templated Aerosol Synthesis of MoS<sub>2</sub>-Amorphous Carbon Composite with Open Macropores as Battery Electrode. *ChemSusChem* **2015**, 8, 2260–2267.
- (2) Wang, J.; Luo, C.; Gao, T.; Langrock, A.; Mignerey, A. C.; Wang, C. An Advanced MoS<sub>2</sub>/Carbon Anode for High-Performance Sodium-Ion Batteries. *Small* **2015**, 11, 473–481.
- (3) Choi, S. H.; Ko, Y. N.; Lee, J.-K.; Kang, Y. C. 3D MoS<sub>2</sub>-Graphene Microspheres Consisting of Multiple Nanospheres with Superior Sodium Ion Storage Properties. *Adv. Funct. Mater.* **2015**, 25, 1780–1788.
- (4) Zhu, C.; Mu, X.; van Aken, P. A.; Yu, Y.; Maier, J. Single-Layered Ultrasmall Nanoplates of MoS<sub>2</sub> Embedded in Carbon Nanofibers with Excellent Electrochemical Performance for Lithium and Sodium Storage. *Angew. Chem. Int. Ed.* **2014**, 53, 2152–2156.
- (5) David, L.; Bhandavat, R.; Singh, G. MoS<sub>2</sub>/Graphene Composite Paper for Sodium-Ion Battery Electrodes. *ACS Nano* **2014**, 8, 1759–1770.
- (6) Wang, Y.-X.; Chou, S.-L.; Wexler, D.; Liu, H.-K.; Dou, S.-X. High-Performance Sodium-Ion Batteries and Sodium-Ion Pseudocapacitors Based on MoS<sub>2</sub>/Graphene Composites. *Chem. - A Eur. J.* **2014**, 20, 9607–9612.
- (7) Su, D.; Dou, S.; Wang, G. Ultrathin MoS<sub>2</sub> Nanosheets as Anode Materials for Sodium-Ion Batteries with Superior Performance. *Adv. Energy Mater.* **2015**, 5, 1401205.
- (8) Lu, Y.; Zhao, Q.; Zhang, N.; Lei, K.; Li, F.; Chen, J. Facile Spraying Synthesis and High-Performance Sodium Storage of Mesoporous MoS<sub>2</sub>/C Microspheres. *Adv. Funct. Mater.* **2016**, 26, 911–918.
